# Supplementary material for: Efficient pollutant degradation by peroxymonosulfate activated by a Co/Mn metal–organic framework
Source: Royal Society of Chemistry journal article supplement (doi:10.1039/d4dt00161c), 2024-01-01
Supplement: d4dt00161c1.pdf [file d4dt00161c1.pdf]

## Supporting Information

### Efficient Pollutant Degradation by Peroxymonosulfate Activated by a Co/Mn Metal-Organic Framework

Ya Li,<sup>a</sup> Chong-Chen Wang,<sup>a\*</sup> Fu-Xue Wang,<sup>a</sup> Xing-Yuan Liu,<sup>a</sup> Peng Wang,<sup>a</sup> Fei Wang,<sup>a</sup> Mingyi Sun<sup>a</sup> and Baoyi Yu<sup>b</sup>

<sup>a</sup>Beijing Key Laboratory of Functional Materials for Building Structure and Environment Remediation, Beijing University of Civil Engineering and Architecture, Beijing 100044, China

<sup>b</sup>Key Laboratory of Urban Agriculture (North China), Ministry of Agriculture, College of Biological Sciences Engineering, Beijing University of Agriculture, Beijing 102206, China

#### Test S1. Materials/reagents and characterizations:

**Table S1. Reagents used in this work**

| Regent name                                             | CAS number | Manufacturers                        |
|---------------------------------------------------------|------------|--------------------------------------|
| Cobalt(II) carbonate hydroxide                          | 7791-13-1  | Beijing Chemical Works               |
| Manganese chloride monohydrate                          |            | Beijing Chemical Works               |
| Sodium hydroxide                                        | 1310-73-2  | Beijing Chemical Reagent Factory     |
| Nitric acid                                             | 7697-37-2  | Beijing Chemical Works               |
| RhB                                                     | 81-88-9    | J&K Scientific Ltd.                  |
| 1,2,3,4,5,6-cyclohexane-hexacarboxylic acid monohydrate | 2216-84-4  | TCI (Shanghai) Development Co., Ltd. |
| potassium peroxomonosulfate                             | 37222-66-5 | J&K Scientific Ltd.                  |
| Sodium chloride                                         | 7647-14-5  | Macklin Inc.                         |
| Sodium nitrate                                          | 7631-99-4  | Macklin Inc.                         |
| Sodium dihydrogen phosphate                             | 7558-80-7  | Beijing Chemical Works               |
| Acetonitrile                                            | 75-05-8    | J&K Scientific Ltd.                  |
| Methanol                                                | 67-56-1    | Macklin Inc.                         |
| tert-Butanol                                            | 75-65-0    | Macklin Inc.                         |
| 1,4-benzoquinone                                        | 106-51-4   | J&K Scientific Ltd.                  |
| Sodium hydrogen phosphate                               | 7558-79-4  | Beijing Chemical Works               |
| Rhodamine B                                             | 81-88-9    | J&K Scientific Ltd.                  |
| Ofloxacin                                               | 82419-36-1 | J&K Scientific Ltd.                  |
| Sulfamethoxazole                                        | 723-46-6   | J&K Scientific Ltd.                  |
| Bisphenol A                                             | 80-05-7    | J&K Scientific Ltd.                  |

\*Corresponding author.

E-mail address: [wangchongchen@bucea.edu.cn](mailto:wangchongchen@bucea.edu.cn), [chongchenwang@126.com](mailto:chongchenwang@126.com) (C.-C. Wang)

### Test S2. Analytical methods:

The X-ray single-crystal data of BUC-101 was collected utilizing a Rigaku oxford diffraction XtaLAB mini II detector diffractometer with Mo  $K\alpha$  radiation ( $\lambda = 0.71073 \text{ \AA}$ ) at 293(2) K. The SMART software and SAINT software were used for data collection and extraction, respectively. Besides, empirical absorption correction was performed using the SADABS program and the structure was analyzed utilizing Olex2 with the SIR2004 structure solution program by Direct Methods. Finally, the structure of BUC-101 was refined with the ShelXL refinement package by Least Squares minimization.

Powder X-ray diffraction (PXRD) patterns were recorded on a Dandonghaoyuan DX-2700B diffractometer in the range of  $2\theta = 5^\circ - 50^\circ$  with Cu  $K\alpha$  radiation. Fourier transform infrared (FTIR) spectra in the range of 4000 to 400  $\text{cm}^{-1}$  were recorded by an infrared spectrophotometer with KBr pellets (Thermo, Nicolet 6700, US). The morphology of the materials was measured by a scanning electron microscopy (SEM) (TM3030Plus, Hitachi Limited, Japan). X-ray photoelectron spectroscopy (XPS) was observed using a ThermoFisher Thermo.

The concentration of pollutants (SMX, OFC, BPA) was identified by LC (LC-20A, Shimadzu, Japan). The LC was equipped with a UV-Vis detector and Eclipse Plus C18 column (250mm $\times$ 4.6mm, 5 $\mu$ m). BQ were analyzed by using an ultra-high performance liquid chromatography (UHPLC, Thermo Scientific Vanquish Flex) equipped with a multi-wavelength UV detector. The separation was performed on a C18 reversed-phase column (2.1 mm  $\times$  100 mm, 1.7  $\mu$ m) at 30  $^\circ\text{C}$ . The wavelength of the UV detector was set as 246 nm for BQ detection, the mobile phase for BQ detection was composed of acetonitrile and distilled water (30/70, v/v) with a flow rate of 0.4 mL/min, and the injection volume was 20  $\mu$ L.

The generated  $\text{SO}_4^{\cdot-}$  radicals were quantified by detecting 4-benzoquinone (BQ) that was generated from the reaction of p-hydroxybenzoic acid (HBA) and  $\text{SO}_4^{\cdot-}$ .<sup>1,2</sup> Briefly, 15 mg Co-H<sub>6</sub>chhc were added into 50.0 mL deionized water, in which the molar ratios of HBA:PMS were varied between 1:1~11:1. At pre-set time interval, 1.2 mL sample was taken out and filtered by 0.22  $\mu$ m PTFE filter. Meanwhile, the excessive methanol (10  $\mu$ L) was immediately added to quench ROS. The formed BQ can be detected by an ultra-high performance liquid chromatography (UHPLC, Thermo Scientific Vanquish Flex). Finally, the  $\text{SO}_4^{\cdot-}$  concentrations were calculated based on the stoichiometric ratio of  $\text{SO}_4^{\cdot-}$  to BQ.

The quantification of residual PMS was carried out by determining  $\text{I}_3^-$  concentration. In brief, 0.5 mL reacted solution was taken out and mixed with 4.5 mL 1.11 g/L KI aqueous solution, which was stirred for 30 min to ensure the full reaction between  $\text{I}^-$  and  $\text{HSO}_5^-$  to produce  $\text{I}_3^-$ . The  $\text{I}_3^-$  concentration, proportional to PMS, was determined at  $\lambda_{\text{max}} = 352 \text{ nm}$  by UV-vis spectrophotometer<sup>3</sup>.

### Test S3. X-ray crystal structural analysis:

**Table S2** Details of X-ray data collection and refinement for BUC-101

| Copound             | BUC-101                                                                            |                                         |                |
|---------------------|------------------------------------------------------------------------------------|-----------------------------------------|----------------|
| Empirical formula   | C <sub>4</sub> H <sub>6</sub> Co <sub>0.56</sub> Mn <sub>0.44</sub> O <sub>6</sub> | Z                                       | 18             |
| Formula weight      | 207.26                                                                             | Dcalcd (g/cm <sup>3</sup> )             | 2.304          |
| Crystal system      | trigonal                                                                           | $\mu$ (mm <sup>-1</sup> )               | 2.557          |
| Space group         | R-3(148)                                                                           | Rint                                    | 0.0258         |
| a (Å)               | 14.4552(7)                                                                         | reflections collected                   | 4275           |
| b (Å)               | 14.4552(7)                                                                         | independent reflections                 | 1686           |
| c (Å)               | 14.8584(9)                                                                         | F(000)                                  | 1874.0         |
| $\alpha$ (°)        | 90                                                                                 | GOF on F <sup>2</sup>                   | 1.086          |
| $\beta$ (°)         | 90                                                                                 | R1, wR2 [ $I \geq 2\sigma(I)$ ]         | 0.0302, 0.0800 |
| $\gamma$ (°)        | 120                                                                                | R1, wR2 [all data]                      | 0.0380, 0.0831 |
| V (Å <sup>3</sup> ) | 2688.8(3)                                                                          | max/min e- density (e Å <sup>-3</sup> ) | 0.78/-0.48     |

**Table S3** Selected bond lengths (Å) and angles (°) for BUC-101

| Length (Å) |           |        |           |
|------------|-----------|--------|-----------|
| Mn—O1      | 2.137(14) | Co—O1  | 2.115(10) |
| Mn—O2      | 2.114(15) | Co—O2  | 2.141(11) |
| Mn—O3      | 2.061(15) | Co—O3  | 2.197(10) |
| Mn—O4      | 2.192(15) | Co—O4  | 2.053(10) |
| Mn—O2W     | 2.130(15) | Co—O1W | 2.158(12) |
| Mn—O1W     | 2.197(17) | Co—O2W | 2.186(10) |

| Angle (°)  |          |            |          |
|------------|----------|------------|----------|
| O1—Mn—O2   | 168.7(9) | O1—Co—O2   | 167.5(6) |
| O1—Mn—O3   | 96.4(6)  | O1—Co—O3   | 93.1(4)  |
| O1—Mn—O4   | 87.6(6)  | O1—Co—O4   | 91.9(4)  |
| O1—Mn—O1W  | 84.0(6)  | O1—Co—O1W  | 85.5(4)  |
| O1—Mn—O2W  | 81.1(4)  | O1—Co—O2W  | 80.3(3)  |
| O2—Mn—O3   | 89.3(6)  | O2—Co—O3   | 85.1(4)  |
| O2—Mn—O4   | 88.3(6)  | O2—Co—O4   | 91.3(4)  |
| O2—Mn—O1W  | 106.2(5) | O2—Co—O1W  | 106.6(4) |
| O2—Mn—O2W  | 89.4(7)  | O2—Co—O2W  | 87.2(4)  |
| O3—Mn—O4   | 171.2(8) | O3—Co—O4   | 172.6(5) |
| O3—Mn—O1W  | 86.4(7)  | O3—Co1—O1W | 82.0(4)  |
| O3—Mn—O2W  | 88.1(5)  | O3—Co—O2W  | 84.1(4)  |
| O4—Mn—O1W  | 86.2(5)  | O4—Co—O1W  | 90.8(4)  |
| O4—Mn—O2W  | 100.3(7) | O4—Co—O2W  | 102.9(5) |
| O1W—Mn—O2W | 163.4(8) | O1W—Co—O2W | 160.5(5) |

#### Test S4. Results and discussion:

**Table S4** the ratio of element in BUC-101

| Elt. | Line | Intensity<br>(c/s) | Atomic<br>(wt.%) | Atomic<br>Ratio | Conc<br>(wt.%) |
|------|------|--------------------|------------------|-----------------|----------------|
| C    | Ka   | 2.80               | 22.079           | 0.3536          | 12.349         |
| O    | Ka   | 16.03              | 62.437           | 1.0000          | 46.518         |
| Mn   | Ka   | 3.50               | 7.307            | 0.1170          | 18.693         |
| Co   | Ka   | 2.48               | 8.177            | 0.1310          | 22.441         |
|      |      |                    | 100.000          |                 | 100.000        |

**Table S5** XPS results of Co and Mn content for the BUC-101 sample

| elements |                  | BUC-101<br>before |             | BUC-101<br>after |             |
|----------|------------------|-------------------|-------------|------------------|-------------|
|          |                  | Peaks (eV)        | Content (%) | Peaks (eV)       | Content (%) |
| Co       | Co <sup>3+</sup> | 781.51, 797.27    | 55.01%      | 781.45, 797.32   | 53.68%      |
|          | Co <sup>2+</sup> | 784.88, 801.23    | 44.09%      | 784.78, 801.26   | 46.32%      |
| Mn       | Mn <sup>3+</sup> | 643.17, 655.16    | 40.85%      | 643.01, 654.94   | 43.18%      |
|          | Mn <sup>2+</sup> | 641.39, 653.37    | 59.15%      | 641.25, 653.29   | 56.82%      |

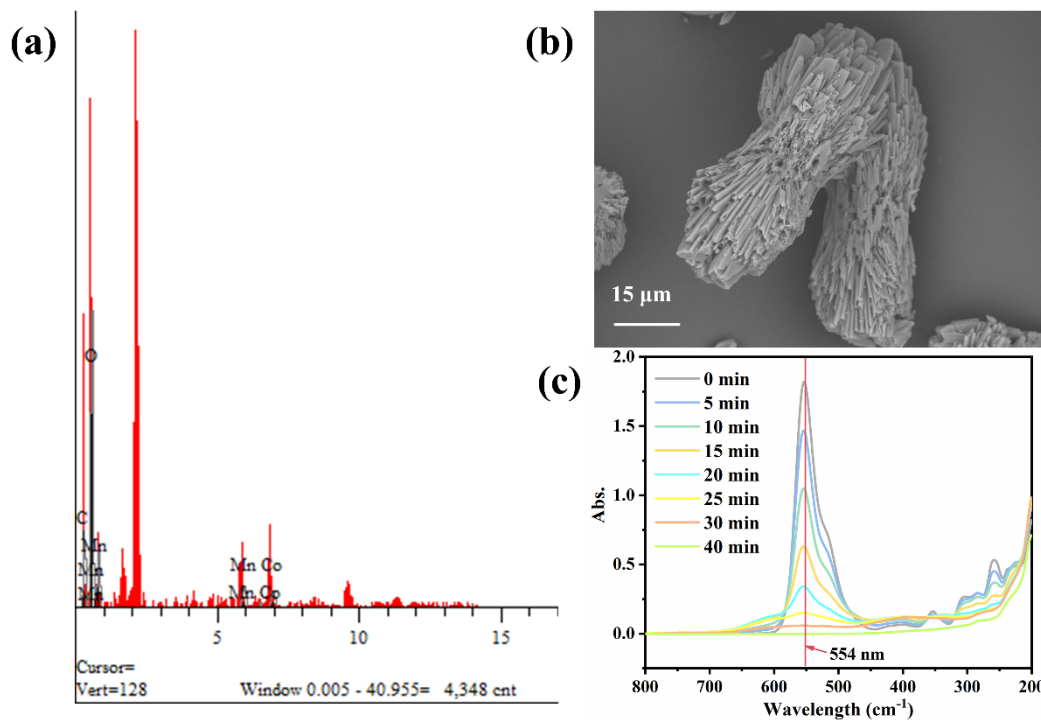

**Fig. S1** (a) The EDS spectrum taken from BUC-101; (b) the SEM image of BUC-101 after 5 cycles catalytic reaction; (c) The UV-Vis absorption spectra in in BUC-101/PMS/RhB system.

## References

1. J. Criquet and N. K. V. Leitner, *Radiation Physics and Chemistry*, 2015, **106**, 307-314.
2. W.-D. Oh, Z. Dong and T.-T. Lim, *Applied Catalysis B: Environmental*, 2016, **194**, 169-201.
3. J. Yan, J. Li, J. Peng, H. Zhang, Y. Zhang and B. Lai, *Chemical Engineering Journal*, 2019, **359**, 1097-1110.
